# Supplementary material for: ELIMINATOR: essentiality analysis using multisystem networks and integer programming
Source: BMC Bioinformatics. 2022 Aug 6;23:324. doi: 10.1186/s12859-022-04855-z (PMC9357337; doi:10.1186/s12859-022-04855-z)
Supplement: Supplementary file 5 — Additional file 5: Table S4. BRCA group-specific essentiality results (complete list). [file 12859_2022_4855_MOESM5_ESM.xlsx]

## Sheet: Supplementary Table 4 - Cancer 
Supplementary Table 4 - BRCA group-specific essentiality results (complete list). geneID: gene identifier in HGNC nomenclature; group: BRCA group being studyed; p-value (hypergeometric test): p-value from a hypergeometric test; adjusted p-value (hypergeometric test): adjusted p-value after multiple-testing comparison, # Essential in group: number of patients predicted as essential from the group …
geneID	group	p-value (hypergeometric test)	adjusted p-value (hypergeometric test)	# Essential in group	# Patients in group	# Essential	Average Achilles Score
AKT1	TNBC	0.99939	1	1	55	17	-0.140301
AKT1	Her2	0.00577139	0.0601021	9	39	17	-0.140301
AKT1	Luminal A	0.969822	1	0	29	17	-0.140301
AKT1	Luminal B	0.0177035	0.144499	7	30	17	-0.140301
ALPHA6INTEGRIN	TNBC	0.0174702	0.144499	48	55	126	NA
ALPHA6INTEGRIN	Her2	0.999958	1	21	39	126	NA
ALPHA6INTEGRIN	Luminal A	0.0143471	0.122051	27	29	126	NA
ALPHA6INTEGRIN	Luminal B	0.982375	1	19	30	126	NA
ANGPT1	TNBC	4.16e-05	0.000837365	12	55	14	0.0138889
ANGPT1	Her2	0.981439	1	0	39	14	0.0138889
ANGPT1	Luminal A	0.942228	1	0	29	14	0.0138889
ANGPT1	Luminal B	0.94822	1	0	30	14	0.0138889
ANGPT2	TNBC	0.933523	1	2	55	11	-0.0343233
ANGPT2	Her2	0.00414989	0.0455733	7	39	11	-0.0343233
ANGPT2	Luminal A	0.890972	1	0	29	11	-0.0343233
ANGPT2	Luminal B	0.633342	1	2	30	11	-0.0343233
AURKB	TNBC	1.59e-19	4.81e-17	48	55	65	-1.44002
AURKB	Her2	0.97017	1	11	39	65	-1.44002
AURKB	Luminal A	1	1	0	29	65	-1.44002
AURKB	Luminal B	0.996909	1	6	30	65	-1.44002
BAD	TNBC	0.335366	0.800636	0	55	1	-0.120103
BAD	Her2	0.237805	0.704979	0	39	1	-0.120103
BAD	Luminal A	0.176829	0.653774	0	29	1	-0.120103
BAD	Luminal B	0.182927	0.653774	1	30	1	-0.120103
BAIAP2	TNBC	0.335366	0.800636	0	55	1	-0.154966
BAIAP2	Her2	0.237805	0.704979	1	39	1	-0.154966
BAIAP2	Luminal A	0.176829	0.653774	0	29	1	-0.154966
BAIAP2	Luminal B	0.182927	0.653774	0	30	1	-0.154966
BAX	TNBC	0.00039045	0.00561504	15	55	22	0.234994
BAX	Her2	0.822989	1	4	39	22	0.234994
BAX	Luminal A	0.990113	1	0	29	22	0.234994
BAX	Luminal B	0.814272	1	3	30	22	0.234994
BCLXL	TNBC	0.999936	1	40	55	142	NA
BCLXL	Her2	0.358754	0.843141	35	39	142	NA
BCLXL	Luminal A	0.00988736	0.0933897	29	29	142	NA
BCLXL	Luminal B	0.395304	0.918322	27	30	142	NA
BETA1INTEGRIN	TNBC	0.0174702	0.144499	48	55	126	NA
BETA1INTEGRIN	Her2	0.999958	1	21	39	126	NA
BETA1INTEGRIN	Luminal A	0.0143471	0.122051	27	29	126	NA
BETA1INTEGRIN	Luminal B	0.982375	1	19	30	126	NA
BIRC3	TNBC	0.000249879	0.0040791	41	55	90	0.149018
BIRC3	Her2	0.486946	1	22	39	90	0.149018
BIRC3	Luminal A	0.839679	1	14	29	90	0.149018
BIRC3	Luminal B	0.977957	1	12	30	90	0.149018
BMP4	TNBC	0.559629	1	0	55	2	0.0423322
BMP4	Her2	0.420171	0.944563	0	39	2	0.0423322
BMP4	Luminal A	0.323283	0.800636	0	29	2	0.0423322
BMP4	Luminal B	0.0325453	0.241508	2	30	2	0.0423322
BRSK1	TNBC	0.335366	0.800636	0	55	1	0.0386264
BRSK1	Her2	0.237805	0.704979	0	39	1	0.0386264
BRSK1	Luminal A	0.176829	0.653774	0	29	1	0.0386264
BRSK1	Luminal B	0.182927	0.653774	0	30	1	0.0386264
CAPN2	TNBC	0.808501	1	0	55	4	0.00423005
CAPN2	Her2	0.666401	1	0	39	4	0.00423005
CAPN2	Luminal A	0.544496	1	0	29	4	0.00423005
CAPN2	Luminal B	0.557993	1	0	30	4	0.00423005
CASP3	TNBC	0.159859	0.653774	30	55	79	0.0735822
CASP3	Her2	0.0416207	0.28246	24	39	79	0.0735822
CASP3	Luminal A	0.999131	1	7	29	79	0.0735822
CASP3	Luminal B	0.108847	0.566403	18	30	79	0.0735822
CBLB	TNBC	0.335366	0.800636	1	55	1	0.0349022
CBLB	Her2	0.237805	0.704979	0	39	1	0.0349022
CBLB	Luminal A	0.176829	0.653774	0	29	1	0.0349022
CBLB	Luminal B	0.182927	0.653774	0	30	1	0.0349022
CCNA2	TNBC	0.0137516	0.120376	15	55	28	-1.37597
CCNA2	Her2	0.0860105	0.483119	10	39	28	-1.37597
CCNA2	Luminal A	0.997558	1	0	29	28	-1.37597
CCNA2	Luminal B	0.927798	1	3	30	28	-1.37597
CCND3	TNBC	1	1	0	55	62	-0.237874
CCND3	Her2	0.999417	1	7	39	62	-0.237874
CCND3	Luminal A	2.97e-15	4.48e-13	29	29	62	-0.237874
CCND3	Luminal B	0.0951015	0.517489	15	30	62	-0.237874
CDK5	TNBC	0.0363484	0.258288	3	55	3	-0.0955352
CDK5	Her2	0.559759	1	0	39	3	-0.0955352
CDK5	Luminal A	0.444424	0.969068	0	29	3	-0.0955352
CDK5	Luminal B	0.45677	0.980173	0	30	3	-0.0955352
CDK5R1	TNBC	0.210853	0.703618	5	55	10	0.112919
CDK5R1	Her2	0.190274	0.657162	4	39	10	0.112919
CDK5R1	Luminal A	0.865677	1	0	29	10	0.112919
CDK5R1	Luminal B	0.875627	1	1	30	10	0.112919
CDKN1A	TNBC	1	1	0	55	47	0.139952
CDKN1A	Her2	0.991804	1	6	39	47	0.139952
CDKN1A	Luminal A	8.2e-13	8.25e-11	25	29	47	0.139952
CDKN1A	Luminal B	0.0992136	0.53031	12	30	47	0.139952
CDKN1B	TNBC	0.1283	0.605414	26	55	66	0.00475121
CDKN1B	Her2	0.99983	1	7	39	66	0.00475121
CDKN1B	Luminal A	2.99e-06	0.000106271	23	29	66	0.00475121
CDKN1B	Luminal B	0.931315	1	9	30	66	0.00475121
CORTACTIN	TNBC	0.118452	0.584756	8	55	16	NA
CORTACTIN	Her2	0.32121	0.800636	5	39	16	NA
CORTACTIN	Luminal A	0.817344	1	2	29	16	NA
CORTACTIN	Luminal B	0.966916	1	1	30	16	NA
CRKI	TNBC	0.98152	1	45	55	145	NA
CRKI	Her2	0.120049	0.584756	37	39	145	NA
CRKI	Luminal A	0.774654	1	25	29	145	NA
CRKI	Luminal B	0.527349	1	27	30	145	NA
CTGF	TNBC	0.901944	1	52	55	158	0.228126
CTGF	Her2	0.190403	0.657162	39	39	158	0.228126
CTGF	Luminal A	0.304922	0.800636	29	29	158	0.228126
CTGF	Luminal B	0.29137	0.800636	30	30	158	0.228126
CYCS	TNBC	0.559629	1	1	55	2	-1.05817
CYCS	Her2	0.420171	0.944563	1	39	2	-1.05817
CYCS	Luminal A	0.323283	0.800636	0	29	2	-1.05817
CYCS	Luminal B	0.333308	0.800636	0	30	2	-1.05817
DCX	TNBC	0.143121	0.653774	7	55	14	0.126874
DCX	Her2	0.981439	1	0	39	14	0.126874
DCX	Luminal A	0.942228	1	0	29	14	0.126874
DCX	Luminal B	0.768486	1	2	30	14	0.126874
DIAPH3	TNBC	0.000735251	0.00959057	8	55	9	-0.274711
DIAPH3	Her2	0.919164	1	1	39	9	-0.274711
DIAPH3	Luminal A	0.834761	1	0	29	9	-0.274711
DIAPH3	Luminal B	0.845777	1	0	30	9	-0.274711
DKK1	TNBC	0.583193	1	15	55	45	-0.246834
DKK1	Her2	9.34e-06	0.00026865	22	39	45	-0.246834
DKK1	Luminal A	0.99658	1	3	29	45	-0.246834
DKK1	Luminal B	0.959496	1	5	30	45	-0.246834
DKK2	TNBC	0.9178	1	0	55	6	0.0229626
DKK2	Her2	0.809597	1	0	39	6	0.0229626
DKK2	Luminal A	0.000670054	0.00899361	5	29	6	0.0229626
DKK2	Luminal B	0.70863	1	1	30	6	0.0229626
DNAJA3	TNBC	0.98152	1	45	55	145	-0.859098
DNAJA3	Her2	0.120049	0.584756	37	39	145	-0.859098
DNAJA3	Luminal A	0.774654	1	25	29	145	-0.859098
DNAJA3	Luminal B	0.527349	1	27	30	145	-0.859098
DNM1	TNBC	0.335366	0.800636	1	55	1	-0.455027
DNM1	Her2	0.237805	0.704979	0	39	1	-0.455027
DNM1	Luminal A	0.176829	0.653774	0	29	1	-0.455027
DNM1	Luminal B	0.182927	0.653774	0	30	1	-0.455027
E4ICDS00	TNBC	3.18e-10	2.4e-08	52	55	104	NA
E4ICDS00	Her2	1	1	0	39	104	NA
E4ICDS00	Luminal A	3.4e-07	1.58e-05	29	29	104	NA
E4ICDS00	Luminal B	0.999049	1	12	30	104	NA
EFNA1	TNBC	0.545189	1	2	55	5	-0.0462063
EFNA1	Her2	0.341143	0.80804	2	39	5	-0.0462063
EFNA1	Luminal A	0.627056	1	0	29	5	-0.0462063
EFNA1	Luminal B	0.640869	1	1	30	5	-0.0462063
EFNA5	TNBC	3.64e-05	0.00075881	24	55	39	-0.0243905
EFNA5	Her2	0.623578	1	9	39	39	-0.0243905
EFNA5	Luminal A	0.988198	1	3	29	39	-0.0243905
EFNA5	Luminal B	0.990893	1	3	30	39	-0.0243905
EFNB2	TNBC	0.863649	1	47	55	145	0.167895
EFNB2	Her2	0.721767	1	34	39	145	0.167895
EFNB2	Luminal A	0.306076	0.800636	27	29	145	0.167895
EFNB2	Luminal B	0.750481	1	26	30	145	0.167895
ENAH	TNBC	0.96256	1	42	55	136	0.0102533
ENAH	Her2	0.913989	1	30	39	136	0.0102533
ENAH	Luminal A	0.219893	0.704979	26	29	136	0.0102533
ENAH	Luminal B	0.194813	0.664786	27	30	136	0.0102533
EPHA2	TNBC	0.335366	0.800636	0	55	1	0.0892558
EPHA2	Her2	0.237805	0.704979	1	39	1	0.0892558
EPHA2	Luminal A	0.176829	0.653774	0	29	1	0.0892558
EPHA2	Luminal B	0.182927	0.653774	0	30	1	0.0892558
EPHA34567	TNBC	3.64e-05	0.00075881	24	55	39	NA
EPHA34567	Her2	0.623578	1	9	39	39	NA
EPHA34567	Luminal A	0.988198	1	3	29	39	NA
EPHA34567	Luminal B	0.990893	1	3	30	39	NA
EPHA4	TNBC	0.209839	0.703618	3	55	5	0.12137
EPHA4	Her2	0.747716	1	1	39	5	0.12137
EPHA4	Luminal A	0.627056	1	0	29	5	0.12137
EPHA4	Luminal B	0.640869	1	1	30	5	0.12137
EPHB4	TNBC	0.991307	1	41	55	137	0.142024
EPHB4	Her2	0.710163	1	32	39	137	0.142024
EPHB4	Luminal A	0.0989735	0.53031	27	29	137	0.142024
EPHB4	Luminal B	0.420674	0.944563	26	30	137	0.142024
ERBB2	TNBC	1	1	3	55	59	-0.408466
ERBB2	Her2	6.4e-21	3.86e-18	38	39	59	-0.408466
ERBB2	Luminal A	1	1	0	29	59	-0.408466
ERBB2	Luminal B	0.00275144	0.0307754	18	30	59	-0.408466
EZR	TNBC	0.507762	1	35	55	103	0.0940738
EZR	Her2	0.126339	0.600856	28	39	103	0.0940738
EZR	Luminal A	0.874169	1	16	29	103	0.0940738
EZR	Luminal B	0.023065	0.178606	24	30	103	0.0940738
F11R	TNBC	0.335366	0.800636	0	55	1	-0.0662451
F11R	Her2	0.237805	0.704979	0	39	1	-0.0662451
F11R	Luminal A	0.176829	0.653774	0	29	1	-0.0662451
F11R	Luminal B	0.182927	0.653774	1	30	1	-0.0662451
FGF2	TNBC	0.335366	0.800636	0	55	1	0.144466
FGF2	Her2	0.237805	0.704979	0	39	1	0.144466
FGF2	Luminal A	0.176829	0.653774	0	29	1	0.144466
FGF2	Luminal B	0.182927	0.653774	1	30	1	0.144466
FKBP1A	TNBC	0.901944	1	52	55	158	-0.174099
FKBP1A	Her2	0.190403	0.657162	39	39	158	-0.174099
FKBP1A	Luminal A	0.304922	0.800636	29	29	158	-0.174099
FKBP1A	Luminal B	0.29137	0.800636	30	30	158	-0.174099
FLNA	TNBC	0.335366	0.800636	1	55	1	0.164748
FLNA	Her2	0.237805	0.704979	0	39	1	0.164748
FLNA	Luminal A	0.176829	0.653774	0	29	1	0.164748
FLNA	Luminal B	0.182927	0.653774	0	30	1	0.164748
FOS	TNBC	0.96877	1	43	55	139	-0.102284
FOS	Her2	0.0317534	0.239738	37	39	139	-0.102284
FOS	Luminal A	0.00495524	0.0525081	29	29	139	-0.102284
FOS	Luminal B	0.859824	1	24	30	139	-0.102284
FOXO13A4INACTIVE	TNBC	0.979423	1	33	55	114	NA
FOXO13A4INACTIVE	Her2	0.741801	1	26	39	114	NA
FOXO13A4INACTIVE	Luminal A	0.148486	0.653774	23	29	114	NA
FOXO13A4INACTIVE	Luminal B	0.238106	0.704979	23	30	114	NA
FOXO3	TNBC	0.194434	0.664786	49	55	139	-0.0721973
FOXO3	Her2	0.235419	0.704979	35	39	139	-0.0721973
FOXO3	Luminal A	0.879596	1	23	29	139	-0.0721973
FOXO3	Luminal B	0.944564	1	23	30	139	-0.0721973
FRAP1	TNBC	0.664634	1	55	55	163	NA
FRAP1	Her2	0.762195	1	39	39	163	NA
FRAP1	Luminal A	0.823171	1	29	29	163	NA
FRAP1	Luminal B	1	1	29	30	163	NA
FYN	TNBC	0.884473	1	13	55	47	-0.00414584
FYN	Her2	0.602473	1	11	39	47	-0.00414584
FYN	Luminal A	0.45763	0.980173	9	29	47	-0.00414584
FYN	Luminal B	0.337438	0.802411	10	30	47	-0.00414584
FZD1	TNBC	0.043731	0.290259	4	55	5	-0.0563483
FZD1	Her2	0.747716	1	0	39	5	-0.0563483
FZD1	Luminal A	0.627056	1	1	29	5	-0.0563483
FZD1	Luminal B	0.640869	1	0	30	5	-0.0563483
GLI3	TNBC	0.97746	1	1	55	9	0.0619328
GLI3	Her2	0.919164	1	0	39	9	0.0619328
GLI3	Luminal A	7.78e-05	0.00134629	7	29	9	0.0619328
GLI3	Luminal B	0.845777	1	1	30	9	0.0619328
GNAI1	TNBC	1.24e-06	4.98e-05	38	55	70	-0.107025
GNAI1	Her2	0.245278	0.719165	19	39	70	-0.107025
GNAI1	Luminal A	0.993706	1	7	29	70	-0.107025
GNAI1	Luminal B	0.999016	1	6	30	70	-0.107025
GNAI3	TNBC	1.24e-06	4.98e-05	38	55	70	-0.137316
GNAI3	Her2	0.245278	0.719165	19	39	70	-0.137316
GNAI3	Luminal A	0.993706	1	7	29	70	-0.137316
GNAI3	Luminal B	0.999016	1	6	30	70	-0.137316
GPC3	TNBC	0.956046	1	5	55	24	0.0132897
GPC3	Her2	0.95983	1	3	39	24	0.0132897
GPC3	Luminal A	0.423863	0.948198	5	29	24	0.0132897
GPC3	Luminal B	0.862275	1	3	30	24	0.0132897
GRB2	TNBC	0.559629	1	0	55	2	-0.968981
GRB2	Her2	0.420171	0.944563	1	39	2	-0.968981
GRB2	Luminal A	0.323283	0.800636	0	29	2	-0.968981
GRB2	Luminal B	0.333308	0.800636	1	30	2	-0.968981
GRIT1	TNBC	0.998461	1	0	55	15	NA
GRIT1	Her2	0.986265	1	0	39	15	NA
GRIT1	Luminal A	0.00626362	0.0641225	7	29	15	NA
GRIT1	Luminal B	0.958576	1	0	30	15	NA
GSFAMILY	TNBC	0.999877	1	45	55	151	NA
GSFAMILY	Her2	0.626761	1	36	39	151	NA
GSFAMILY	Luminal A	0.0715042	0.431885	29	29	151	NA
GSFAMILY	Luminal B	0.0646186	0.398261	30	30	151	NA
HDAC1	TNBC	0.963652	1	53	55	161	-0.122634
HDAC1	Her2	0.859007	1	38	39	161	-0.122634
HDAC1	Luminal A	0.555576	1	29	29	161	-0.122634
HDAC1	Luminal B	0.54323	1	30	30	161	-0.122634
HURP	TNBC	1	1	0	55	40	NA
HURP	Her2	0.999997	1	0	39	40	NA
HURP	Luminal A	5.28e-17	1.06e-14	26	29	40	NA
HURP	Luminal B	0.992607	1	3	30	40	NA
IL12P70	TNBC	1	1	51	55	160	NA
IL12P70	Her2	0.333599	0.800636	39	39	160	NA
IL12P70	Luminal A	0.455504	0.980173	29	29	160	NA
IL12P70	Luminal B	0.442007	0.969068	30	30	160	NA
IL2RA	TNBC	0.000364943	0.00551064	7	55	7	0.192605
IL2RA	Her2	0.856595	1	0	39	7	0.192605
IL2RA	Luminal A	0.751044	1	0	29	7	0.192605
IL2RA	Luminal B	0.763953	1	0	30	7	0.192605
IL6	TNBC	0.117238	0.584756	6	55	11	0.209697
IL6	Her2	0.24838	0.724742	4	39	11	0.209697
IL6	Luminal A	0.890972	1	1	29	11	0.209697
IL6	Luminal B	0.899855	1	0	30	11	0.209697
IQGAP1	TNBC	0.0605706	0.38109	31	55	77	-0.00958688
IQGAP1	Her2	0.0618453	0.385099	23	39	77	-0.00958688
IQGAP1	Luminal A	0.899911	1	11	29	77	-0.00958688
IQGAP1	Luminal B	0.969344	1	10	30	77	-0.00958688
IRS1	TNBC	0.335366	0.800636	0	55	1	-0.0108373
IRS1	Her2	0.237805	0.704979	0	39	1	-0.0108373
IRS1	Luminal A	0.176829	0.653774	0	29	1	-0.0108373
IRS1	Luminal B	0.182927	0.653774	1	30	1	-0.0108373
IRS2	TNBC	9.74e-08	4.9e-06	47	55	94	-0.349312
IRS2	Her2	0.96363	1	18	39	94	-0.349312
IRS2	Luminal A	0.994214	1	11	29	94	-0.349312
IRS2	Luminal B	0.996799	1	11	30	94	-0.349312
ITGB4	TNBC	0.559629	1	1	55	2	-0.0406221
ITGB4	Her2	0.420171	0.944563	1	39	2	-0.0406221
ITGB4	Luminal A	0.323283	0.800636	0	29	2	-0.0406221
ITGB4	Luminal B	0.333308	0.800636	0	30	2	-0.0406221
JAG1	TNBC	0.260612	0.749568	2	55	3	-0.0511916
JAG1	Her2	0.559759	1	0	39	3	-0.0511916
JAG1	Luminal A	0.444424	0.969068	0	29	3	-0.0511916
JAG1	Luminal B	0.45677	0.980173	1	30	3	-0.0511916
JUN	TNBC	0.96877	1	43	55	139	-0.237192
JUN	Her2	0.0317534	0.239738	37	39	139	-0.237192
JUN	Luminal A	0.00495524	0.0525081	29	29	139	-0.237192
JUN	Luminal B	0.859824	1	24	30	139	-0.237192
KIF20A	TNBC	5.4e-05	0.00105124	13	55	16	-0.539463
KIF20A	Her2	0.98986	1	1	39	16	-0.539463
KIF20A	Luminal A	0.962468	1	0	29	16	-0.539463
KIF20A	Luminal B	0.833469	1	2	30	16	-0.539463
KIT	TNBC	0.109717	0.566403	37	55	98	-0.222827
KIT	Her2	0.994276	1	17	39	98	-0.222827
KIT	Luminal A	0.0913801	0.506363	21	29	98	-0.222827
KIT	Luminal B	0.995686	1	12	30	98	-0.222827
KITLG	TNBC	0.9178	1	0	55	6	0.181627
KITLG	Her2	0.146806	0.653774	3	39	6	0.181627
KITLG	Luminal A	0.695078	1	1	29	6	0.181627
KITLG	Luminal B	0.302066	0.800636	2	30	6	0.181627
KPNA2	TNBC	0.997571	1	0	55	14	-0.397535
KPNA2	Her2	0.981439	1	0	39	14	-0.397535
KPNA2	Luminal A	0.942228	1	1	29	14	-0.397535
KPNA2	Luminal B	0.237914	0.704979	4	30	14	-0.397535
LACTADHERIN	TNBC	0.335366	0.800636	0	55	1	NA
LACTADHERIN	Her2	0.237805	0.704979	0	39	1	NA
LACTADHERIN	Luminal A	0.176829	0.653774	0	29	1	NA
LACTADHERIN	Luminal B	0.182927	0.653774	1	30	1	NA
LAMININALPHA3	TNBC	0.565887	1	53	55	157	NA
LAMININALPHA3	Her2	0.472392	1	38	39	157	NA
LAMININALPHA3	Luminal A	0.640723	1	28	29	157	NA
LAMININALPHA3	Luminal B	0.236047	0.704979	30	30	157	NA
LIMA1	TNBC	1	1	14	55	118	-0.149813
LIMA1	Her2	0.000547808	0.0076948	36	39	118	-0.149813
LIMA1	Luminal A	2.32e-05	0.000561138	29	29	118	-0.149813
LIMA1	Luminal B	1.53e-05	0.000385349	30	30	118	-0.149813
LRP6	TNBC	1.49e-13	1.79e-11	32	55	38	0.00114452
LRP6	Her2	0.999885	1	2	39	38	0.00114452
LRP6	Luminal A	0.947176	1	4	29	38	0.00114452
LRP6	Luminal B	0.999855	1	0	30	38	0.00114452
LYN	TNBC	4.41e-12	3.8e-10	49	55	86	0.0896722
LYN	Her2	0.493496	1	21	39	86	0.0896722
LYN	Luminal A	0.999997	1	5	29	86	0.0896722
LYN	Luminal B	0.998422	1	9	30	86	0.0896722
MAPK1	TNBC	0.0117399	0.104278	4	55	4	-0.129045
MAPK1	Her2	0.666401	1	0	39	4	-0.129045
MAPK1	Luminal A	0.544496	1	0	29	4	-0.129045
MAPK1	Luminal B	0.557993	1	0	30	4	-0.129045
MAPK14	TNBC	0.00721981	0.0714879	8	55	11	-0.153707
MAPK14	Her2	0.51026	1	3	39	11	-0.153707
MAPK14	Luminal A	0.890972	1	0	29	11	-0.153707
MAPK14	Luminal B	0.899855	1	0	30	11	-0.153707
MIB1	TNBC	0.287213	0.800636	39	55	110	-0.348084
MIB1	Her2	0.00132506	0.0156929	34	39	110	-0.348084
MIB1	Luminal A	0.328964	0.800636	21	29	110	-0.348084
MIB1	Luminal B	0.974691	1	16	30	110	-0.348084
MLCK	TNBC	1	1	51	55	160	NA
MLCK	Her2	0.333599	0.800636	39	39	160	NA
MLCK	Luminal A	0.455504	0.980173	29	29	160	NA
MLCK	Luminal B	0.442007	0.969068	30	30	160	NA
MLF1IP	TNBC	6.14e-06	0.000185279	15	55	18	NA
MLF1IP	Her2	0.994513	1	1	39	18	NA
MLF1IP	Luminal A	0.975776	1	0	29	18	NA
MLF1IP	Luminal B	0.882108	1	2	30	18	NA
MST1R	TNBC	0.808501	1	0	55	4	-0.0202219
MST1R	Her2	0.666401	1	1	39	4	-0.0202219
MST1R	Luminal A	0.544496	1	0	29	4	-0.0202219
MST1R	Luminal B	0.0196704	0.158412	3	30	4	-0.0202219
MYB	TNBC	0.922504	1	5	55	22	-0.352593
MYB	Her2	0.936711	1	3	39	22	-0.352593
MYB	Luminal A	0.165367	0.653774	6	29	22	-0.352593
MYB	Luminal B	0.187621	0.657162	6	30	22	-0.352593
NCAN	TNBC	0.000364943	0.00551064	7	55	7	-0.166449
NCAN	Her2	0.856595	1	0	39	7	-0.166449
NCAN	Luminal A	0.751044	1	0	29	7	-0.166449
NCAN	Luminal B	0.763953	1	0	30	7	-0.166449
NCK12	TNBC	1	1	54	55	163	NA
NCK12	Her2	0.762195	1	39	39	163	NA
NCK12	Luminal A	0.823171	1	29	29	163	NA
NCK12	Luminal B	0.817073	1	30	30	163	NA
NCOA3	TNBC	0.974935	1	4	55	22	-0.136296
NCOA3	Her2	0.113322	0.575466	8	39	22	-0.136296
NCOA3	Luminal A	0.990113	1	0	29	22	-0.136296
NCOA3	Luminal B	0.0014062	0.0163336	10	30	22	-0.136296
NFATC2	TNBC	0.335366	0.800636	0	55	1	0.0777034
NFATC2	Her2	0.237805	0.704979	0	39	1	0.0777034
NFATC2	Luminal A	0.176829	0.653774	0	29	1	0.0777034
NFATC2	Luminal B	0.182927	0.653774	1	30	1	0.0777034
NFKB1	TNBC	0.0205009	0.162928	13	55	24	0.111163
NFKB1	Her2	0.991676	1	2	39	24	0.111163
NFKB1	Luminal A	0.227176	0.704979	6	29	24	0.111163
NFKB1	Luminal B	0.862275	1	3	30	24	0.111163
NOTCH1PRECURSOR	TNBC	1.38e-05	0.000363087	53	55	128	NA
NOTCH1PRECURSOR	Her2	0.983383	1	26	39	128	NA
NOTCH1PRECURSOR	Luminal A	0.997993	1	17	29	128	NA
NOTCH1PRECURSOR	Luminal B	0.919244	1	21	30	128	NA
NUMA1	TNBC	0.209839	0.703618	3	55	5	-0.57548
NUMA1	Her2	0.747716	1	1	39	5	-0.57548
NUMA1	Luminal A	0.627056	1	0	29	5	-0.57548
NUMA1	Luminal B	0.640869	1	1	30	5	-0.57548
P130CAS	TNBC	1	1	53	55	162	NA
P130CAS	Her2	0.579829	1	39	39	162	NA
P130CAS	Luminal A	0.676717	1	29	29	162	NA
P130CAS	Luminal B	0.666692	1	30	30	162	NA
P14ARF	TNBC	0.9178	1	0	55	6	NA
P14ARF	Her2	0.809597	1	0	39	6	NA
P14ARF	Luminal A	0.695078	1	0	29	6	NA
P14ARF	Luminal B	0.70863	1	0	30	6	NA
P16INK4A	TNBC	0.982566	1	5	55	27	NA
P16INK4A	Her2	0.00800916	0.0780247	12	39	27	NA
P16INK4A	Luminal A	0.996903	1	0	29	27	NA
P16INK4A	Luminal B	0.914661	1	3	30	27	NA
P38ALPHABETAACTIVE	TNBC	0.888897	1	54	55	162	NA
P38ALPHABETAACTIVE	Her2	0.579829	1	39	39	162	NA
P38ALPHABETAACTIVE	Luminal A	0.676717	1	29	29	162	NA
P38ALPHABETAACTIVE	Luminal B	0.967455	1	29	30	162	NA
PAK1	TNBC	0.0556173	0.353609	10	55	19	-0.0940837
PAK1	Her2	0.968132	1	2	39	19	-0.0940837
PAK1	Luminal A	0.4429	0.969068	4	29	19	-0.0940837
PAK1	Luminal B	0.71851	1	3	30	19	-0.0940837
PCNA	TNBC	0.834131	1	41	55	128	-1.88689
PCNA	Her2	0.083803	0.483119	34	39	128	-1.88689
PCNA	Luminal A	0.0209978	0.16471	27	29	128	-1.88689
PCNA	Luminal B	0.49526	1	24	30	128	-1.88689
PI3KCLASS2BETAPOLYPEPTIDE	TNBC	0.640864	1	34	55	103	NA
PI3KCLASS2BETAPOLYPEPTIDE	Her2	0.99567	1	18	39	103	NA
PI3KCLASS2BETAPOLYPEPTIDE	Luminal A	6.99e-05	0.00129551	27	29	103	NA
PI3KCLASS2BETAPOLYPEPTIDE	Luminal B	0.995525	1	13	30	103	NA
PKA	TNBC	0.998028	1	13	55	62	NA
PKA	Her2	0.891045	1	12	39	62	NA
PKA	Luminal A	0.00084712	0.0106596	19	29	62	NA
PKA	Luminal B	0.469402	0.998306	12	30	62	NA
PKC	TNBC	0.279867	0.797356	42	55	119	NA
PKC	Her2	0.996749	1	22	39	119	NA
PKC	Luminal A	0.256397	0.740975	23	29	119	NA
PKC	Luminal B	0.721725	1	21	30	119	NA
PKCDELTA	TNBC	0.159859	0.653774	30	55	79	NA
PKCDELTA	Her2	0.0416207	0.28246	24	39	79	NA
PKCDELTA	Luminal A	0.999131	1	7	29	79	NA
PKCDELTA	Luminal B	0.108847	0.566403	18	30	79	NA
PLA2G1B	TNBC	0.335366	0.800636	0	55	1	0.0372164
PLA2G1B	Her2	0.237805	0.704979	1	39	1	0.0372164
PLA2G1B	Luminal A	0.176829	0.653774	0	29	1	0.0372164
PLA2G1B	Luminal B	0.182927	0.653774	0	30	1	0.0372164
PLA2G4A	TNBC	8.5e-08	4.67e-06	25	55	34	0.193581
PLA2G4A	Her2	0.881114	1	6	39	34	0.193581
PLA2G4A	Luminal A	0.999438	1	0	29	34	0.193581
PLA2G4A	Luminal B	0.99958	1	0	30	34	0.193581
PLK1	TNBC	6.14e-06	0.000185279	15	55	18	-1.65652
PLK1	Her2	0.994513	1	1	39	18	-1.65652
PLK1	Luminal A	0.975776	1	0	29	18	-1.65652
PLK1	Luminal B	0.882108	1	2	30	18	-1.65652
PLK2	TNBC	1	1	30	55	133	0.0540909
PLK2	Her2	0.0849446	0.483119	35	39	133	0.0540909
PLK2	Luminal A	0.00118194	0.0142778	29	29	133	0.0540909
PLK2	Luminal B	0.0427849	0.287134	28	30	133	0.0540909
PLK4	TNBC	0.335366	0.800636	1	55	1	-0.943549
PLK4	Her2	0.237805	0.704979	0	39	1	-0.943549
PLK4	Luminal A	0.176829	0.653774	0	29	1	-0.943549
PLK4	Luminal B	0.182927	0.653774	0	30	1	-0.943549
PRKACA	TNBC	0.0846989	0.483119	5	55	8	-0.181782
PRKACA	Her2	0.607235	1	2	39	8	-0.181782
PRKACA	Luminal A	0.79703	1	0	29	8	-0.181782
PRKACA	Luminal B	0.809058	1	0	30	8	-0.181782
PRKCB	TNBC	0.559629	1	1	55	2	-0.000457305
PRKCB	Her2	0.420171	0.944563	0	39	2	-0.000457305
PRKCB	Luminal A	0.323283	0.800636	0	29	2	-0.000457305
PRKCB	Luminal B	0.333308	0.800636	1	30	2	-0.000457305
PRKCQ	TNBC	0.335366	0.800636	1	55	1	0.150564
PRKCQ	Her2	0.237805	0.704979	0	39	1	0.150564
PRKCQ	Luminal A	0.176829	0.653774	0	29	1	0.150564
PRKCQ	Luminal B	0.182927	0.653774	0	30	1	0.150564
PTK2	TNBC	8.57e-09	5.75e-07	26	55	34	-0.608102
PTK2	Her2	0.996916	1	3	39	34	-0.608102
PTK2	Luminal A	0.969663	1	3	29	34	-0.608102
PTK2	Luminal B	0.995337	1	2	30	34	-0.608102
PTN	TNBC	0.795123	1	14	55	47	-0.164581
PTN	Her2	0.997911	1	5	39	47	-0.164581
PTN	Luminal A	0.0111672	0.102197	14	29	47	-0.164581
PTN	Luminal B	0.998434	1	3	30	47	-0.164581
PTPN6	TNBC	0.67753	1	14	55	44	0.0714917
PTPN6	Her2	0.953358	1	7	39	44	0.0714917
PTPN6	Luminal A	0.981142	1	4	29	44	0.0714917
PTPN6	Luminal B	0.000565726	0.00776587	16	30	44	0.0714917
PVRL2	TNBC	1	1	4	55	67	NA
PVRL2	Her2	0.701855	1	15	39	67	NA
PVRL2	Luminal A	4.5e-08	2.72e-06	25	29	67	NA
PVRL2	Luminal B	1.27e-05	0.000348656	23	30	67	NA
PVRL3	TNBC	0.0117399	0.104278	4	55	4	NA
PVRL3	Her2	0.666401	1	0	39	4	NA
PVRL3	Luminal A	0.544496	1	0	29	4	NA
PVRL3	Luminal B	0.557993	1	0	30	4	NA
PXN	TNBC	1	1	13	55	96	-0.590881
PXN	Her2	0.16008	0.653774	26	39	96	-0.590881
PXN	Luminal A	0.0698568	0.426197	21	29	96	-0.590881
PXN	Luminal B	0.00157706	0.0179725	25	30	96	-0.590881
RAC1	TNBC	0.993258	1	2	55	17	-0.685435
RAC1	Her2	0.992532	1	0	39	17	-0.685435
RAC1	Luminal A	0.351046	0.82825	4	29	17	-0.685435
RAC1	Luminal B	0.859617	1	2	30	17	-0.685435
RACGAP1	TNBC	0.0327875	0.241508	45	55	118	-1.45764
RACGAP1	Her2	7.8e-05	0.00134629	37	39	118	-1.45764
RACGAP1	Luminal A	1	1	10	29	118	-1.45764
RACGAP1	Luminal B	0.0342488	0.249232	26	30	118	-1.45764
RAD51	TNBC	2.81e-06	0.000106036	20	55	27	-1.06517
RAD51	Her2	0.931601	1	4	39	27	-1.06517
RAD51	Luminal A	0.996903	1	0	29	27	-1.06517
RAD51	Luminal B	0.914661	1	3	30	27	-1.06517
RARGAMMA2	TNBC	0.0846989	0.483119	5	55	8	NA
RARGAMMA2	Her2	0.607235	1	2	39	8	NA
RARGAMMA2	Luminal A	0.79703	1	0	29	8	NA
RARGAMMA2	Luminal B	0.809058	1	0	30	8	NA
RARS	TNBC	0.991676	1	32	55	114	-0.644351
RARS	Her2	0.293392	0.800636	29	39	114	-0.644351
RARS	Luminal A	0.148486	0.653774	23	29	114	-0.644351
RARS	Luminal B	0.121211	0.585692	24	30	114	-0.644351
RASSF5	TNBC	0.0482267	0.313214	31	55	76	-0.18645
RASSF5	Her2	0.18597	0.657162	21	39	76	-0.18645
RASSF5	Luminal A	0.948172	1	10	29	76	-0.18645
RASSF5	Luminal B	0.916713	1	11	30	76	-0.18645
RET	TNBC	0.709138	1	0	55	3	-0.198099
RET	Her2	0.559759	1	1	39	3	-0.198099
RET	Luminal A	0.444424	0.969068	0	29	3	-0.198099
RET	Luminal B	0.0863856	0.483119	2	30	3	-0.198099
RET9	TNBC	0.00038173	0.00561504	55	55	146	NA
RET9	Her2	0.566995	1	35	39	146	NA
RET9	Luminal A	0.979318	1	23	29	146	NA
RET9	Luminal B	0.998884	1	22	30	146	NA
RHOA	TNBC	7.08e-05	0.00129551	28	55	50	-0.357575
RHOA	Her2	0.91384	1	9	39	50	-0.357575
RHOA	Luminal A	0.999868	1	2	29	50	-0.357575
RHOA	Luminal B	0.949302	1	6	30	50	-0.357575
RNF128	TNBC	0.982691	1	13	55	55	-0.0634042
RNF128	Her2	0.727647	1	12	39	55	-0.0634042
RNF128	Luminal A	0.00708623	0.0713347	16	29	55	-0.0634042
RNF128	Luminal B	0.99363	1	5	30	55	-0.0634042
ROCK2	TNBC	0.831397	1	13	55	45	0.0895811
ROCK2	Her2	0.0098956	0.0933897	17	39	45	0.0895811
ROCK2	Luminal A	0.393737	0.918212	9	29	45	0.0895811
ROCK2	Luminal B	0.997519	1	3	30	45	0.0895811
SDC2	TNBC	0.159859	0.653774	30	55	79	-0.0637322
SDC2	Her2	0.0416207	0.28246	24	39	79	-0.0637322
SDC2	Luminal A	0.999131	1	7	29	79	-0.0637322
SDC2	Luminal B	0.108847	0.566403	18	30	79	-0.0637322
SHANK3	TNBC	0.335366	0.800636	0	55	1	NA
SHANK3	Her2	0.237805	0.704979	1	39	1	NA
SHANK3	Luminal A	0.176829	0.653774	0	29	1	NA
SHANK3	Luminal B	0.182927	0.653774	0	30	1	NA
SHP2	TNBC	0.279867	0.797356	42	55	119	NA
SHP2	Her2	0.996749	1	22	39	119	NA
SHP2	Luminal A	0.256397	0.740975	23	29	119	NA
SHP2	Luminal B	0.721725	1	21	30	119	NA
SMAD5	TNBC	0.633062	1	3	55	9	NA
SMAD5	Her2	0.0356524	0.256358	5	39	9	NA
SMAD5	Luminal A	0.834761	1	0	29	9	NA
SMAD5	Luminal B	0.845777	1	1	30	9	NA
SRCFAMILYKINASES	TNBC	3.64e-05	0.00075881	24	55	39	NA
SRCFAMILYKINASES	Her2	0.623578	1	9	39	39	NA
SRCFAMILYKINASES	Luminal A	0.988198	1	3	29	39	NA
SRCFAMILYKINASES	Luminal B	0.990893	1	3	30	39	NA
SRCFAMILYKINASESACTIVE	TNBC	5.35e-06	0.00017962	26	55	41	NA
SRCFAMILYKINASESACTIVE	Her2	0.990183	1	5	39	41	NA
SRCFAMILYKINASESACTIVE	Luminal A	0.999909	1	1	29	41	NA
SRCFAMILYKINASESACTIVE	Luminal B	0.999103	1	2	30	41	NA
SRCYESFYN	TNBC	0.98152	1	45	55	145	NA
SRCYESFYN	Her2	0.120049	0.584756	37	39	145	NA
SRCYESFYN	Luminal A	0.774654	1	25	29	145	NA
SRCYESFYN	Luminal B	0.527349	1	27	30	145	NA
STAT1	TNBC	0.999861	1	2	55	26	0.16184
STAT1	Her2	0.999575	1	1	39	26	0.16184
STAT1	Luminal A	2.86e-05	0.000663539	13	29	26	0.16184
STAT1	Luminal B	0.539975	1	5	30	26	0.16184
STAT3	TNBC	1	1	9	55	75	0.0707289
STAT3	Her2	0.890679	1	15	39	75	0.0707289
STAT3	Luminal A	0.000316247	0.00502666	22	29	75	0.0707289
STAT3	Luminal B	0.000746286	0.00959057	22	30	75	0.0707289
STAT5A	TNBC	0.559629	1	0	55	2	-0.609359
STAT5A	Her2	0.420171	0.944563	0	39	2	-0.609359
STAT5A	Luminal A	0.323283	0.800636	0	29	2	-0.609359
STAT5A	Luminal B	0.333308	0.800636	0	30	2	-0.609359
STAT6	TNBC	0.460561	0.982965	53	55	156	-0.200449
STAT6	Her2	0.997501	1	34	39	156	-0.200449
STAT6	Luminal A	0.20297	0.68873	29	29	156	-0.200449
STAT6	Luminal B	0.551778	1	29	30	156	-0.200449
TIE2	TNBC	0.010597	0.0984702	14	55	25	NA
TIE2	Her2	0.377766	0.884382	7	39	25	NA
TIE2	Luminal A	0.995045	1	0	29	25	NA
TIE2	Luminal B	0.968433	1	2	30	25	NA
TP53	TNBC	0.778368	1	38	55	118	0.0362253
TP53	Her2	0.966611	1	24	39	118	0.0362253
TP53	Luminal A	0.231625	0.704979	23	29	118	0.0362253
TP53	Luminal B	0.523738	1	22	30	118	0.0362253
TRAP1	TNBC	0.901944	1	52	55	158	-0.0324595
TRAP1	Her2	0.190403	0.657162	39	39	158	-0.0324595
TRAP1	Luminal A	0.304922	0.800636	29	29	158	-0.0324595
TRAP1	Luminal B	0.29137	0.800636	30	30	158	-0.0324595
TUBG1	TNBC	1	1	14	55	88	-1.31599
TUBG1	Her2	0.000152881	0.00256501	31	39	88	-1.31599
TUBG1	Luminal A	0.113378	0.575466	19	29	88	-1.31599
TUBG1	Luminal B	0.00104181	0.0128419	24	30	88	-1.31599
VAV1	TNBC	0.709138	1	1	55	3	-0.175698
VAV1	Her2	0.559759	1	0	39	3	-0.175698
VAV1	Luminal A	0.444424	0.969068	0	29	3	-0.175698
VAV1	Luminal B	0.0863856	0.483119	2	30	3	-0.175698
VAV2VAV3	TNBC	0.411049	0.944563	2	55	4	NA
VAV2VAV3	Her2	0.666401	1	1	39	4	NA
VAV2VAV3	Luminal A	0.544496	1	0	29	4	NA
VAV2VAV3	Luminal B	0.557993	1	1	30	4	NA
VPS4	TNBC	0.906313	1	9	55	35	NA
VPS4	Her2	0.999981	1	1	39	35	NA
VPS4	Luminal A	0.125592	0.600856	9	29	35	NA
VPS4	Luminal B	0.662264	1	6	30	35	NA
VTN	TNBC	0.999991	1	21	55	99	-0.200713
VTN	Her2	0.654075	1	23	39	99	-0.200713
VTN	Luminal A	0.0449592	0.295167	22	29	99	-0.200713
VTN	Luminal B	0.0790012	0.472443	22	30	99	-0.200713
WASL	TNBC	0.864705	1	23	55	77	-0.100222
WASL	Her2	0.919868	1	15	39	77	-0.100222
WASL	Luminal A	0.0555301	0.353609	18	29	77	-0.100222
WASL	Luminal B	0.0368745	0.258979	19	30	77	-0.100222
WIF1	TNBC	0.705018	1	8	55	26	-0.105115
WIF1	Her2	0.798203	1	5	39	26	-0.105115
WIF1	Luminal A	0.969199	1	2	29	26	-0.105115
WIF1	Luminal B	0.899512	1	3	30	26	-0.105115
ZFP36	TNBC	0.0939386	0.515808	11	55	23	0.0646128
ZFP36	Her2	0.989022	1	2	39	23	0.0646128
ZFP36	Luminal A	0.992132	1	0	29	23	0.0646128
ZFP36	Luminal B	0.415413	0.944563	5	30	23	0.0646128
